# Supplementary material
Source: PubMed Central journal article supplement (PMC9166917)
Supplement: NIHMS1790518-supplement-1790518_Sup_Tables.pdf [file NIHMS1790518-supplement-1790518_Sup_Tables.pdf]

**Supplementary information**

---

**Immune regulation by fungal strain diversity  
in inflammatory bowel disease**

---

In the format provided by the  
authors and unedited

**Table 1. Fungal genera abundance detected abundance detected in non-IBD and UC individuals**

| <b>Genus</b>     | <b>n (nonIBD)</b> | <b>Abundance (nonIBD)</b> | <b>n (UC)</b> | <b>Abundance (UC)</b> | <b>p.adj</b> |
|------------------|-------------------|---------------------------|---------------|-----------------------|--------------|
| Candida          | 37                | 0.659022921               | 40            | 0.817827815           | 0.0089       |
| Saccharomyces    | 37                | 0.147829019               | 40            | 0.09426436            | 0.012        |
| Rhodotorula      | 37                | 0.055491583               | 40            | 0.002174929           | 0.068        |
| Galactomyces     | 37                | 0.031875586               | 40            | 0.000334147           | 0.0097       |
| Saccharomycopsis | 37                | 0.026297441               | 40            | 0.012502095           | 0.18         |
| Guehomyces       | 37                | 0.020158096               | 40            | 1.22E-05              | 0.14         |
| Trichosporon     | 37                | 0.009869242               | 40            | 0.000326862           | 0.7          |
| Cryptococcus     | 37                | 0.009186264               | 40            | 0.003510156           | 0.12         |
| Malassezia       | 37                | 0.007957525               | 40            | 0.01364634            | 0.1          |
| Meyerozyma       | 37                | 0.006428386               | 40            | 8.75E-06              | 0.078        |
| Other            | 37                | 0.005770262               | 40            | 0.011345802           | 0.012        |
| Cyberlindnera    | 37                | 0.005726457               | 40            | 0.002615145           | 0.8          |
| Debaryomyces     | 37                | 0.005490932               | 40            | 0.0056597             | 0.94         |
| Filobasidium     | 37                | 0.004115408               | 40            | 0.005586823           | 0.03         |
| Wallemia         | 37                | 0.002237                  | 40            | 0.006678702           | 1.3E-05      |
| Aspergillus      | 37                | 0.00221533                | 40            | 0.002294888           | 0.0016       |
| Agaricus         | 37                | 0.000328547               | 40            | 0.009909633           | 0.098        |
| Phoma            | 37                | 0                         | 40            | 0.00686873            | 3.4E-07      |
| Alternaria       | 37                | 0                         | 40            | 0.004432869           | 3.4E-07      |

**Table 2. Fungal strains used in the study**

| strain ID                              | Species          | Strain description                               | Patient | Source             |
|----------------------------------------|------------------|--------------------------------------------------|---------|--------------------|
| SC5314                                 | Candida albicans | Blood-derived reference strain                   | N/A     |                    |
| M1477                                  | Candida albicans | BWP17+Cpl20 (Parental Strain)                    | N/A     | Moyes et al., 2016 |
| M2047                                  | Candida albicans | <i>ece1</i> $\Delta/\Delta$ ( <i>ece</i> mutant) | N/A     | Moyes et al., 2016 |
| IDA651                                 | Candida albicans | Gut-derived commensal strain                     | UC      | This study         |
| IDA652                                 | Candida albicans | Gut-derived commensal strain                     | UC      | This study         |
| IDA653                                 | Candida albicans | Gut-derived commensal strain                     | UC      | This study         |
| IDA921                                 | Candida albicans | Gut-derived commensal strain                     | UC      | This study         |
| IDA922                                 | Candida albicans | Gut-derived commensal strain                     | UC      | This study         |
| IDA923                                 | Candida albicans | Gut-derived commensal strain                     | UC      | This study         |
| IDB311                                 | Candida albicans | Gut-derived commensal strain                     | UC      | This study         |
| IDB312                                 | Candida albicans | Gut-derived commensal strain                     | UC      | This study         |
| IDB313                                 | Candida albicans | Gut-derived commensal strain                     | UC      | This study         |
| IDB831                                 | Candida albicans | Gut-derived commensal strain                     | UC      | This study         |
| IDB832                                 | Candida albicans | Gut-derived commensal strain                     | UC      | This study         |
| IDB833                                 | Candida albicans | Gut-derived commensal strain                     | UC      | This study         |
| IDB071                                 | Candida albicans | Gut-derived commensal strain                     | UC      | This study         |
| IDB072                                 | Candida albicans | Gut-derived commensal strain                     | UC      | This study         |
| IDB073                                 | Candida albicans | Gut-derived commensal strain                     | UC      | This study         |
| IDB101                                 | Candida albicans | Gut-derived commensal strain                     | UC      | This study         |
| IDB102                                 | Candida albicans | Gut-derived commensal strain                     | UC      | This study         |
| IDB104                                 | Candida albicans | Gut-derived commensal strain                     | UC      | This study         |
| IDC481                                 | Candida albicans | Gut-derived commensal strain                     | UC      | This study         |
| IDC482                                 | Candida albicans | Gut-derived commensal strain                     | UC      | This study         |
| IDC483                                 | Candida albicans | Gut-derived commensal strain                     | UC      | This study         |
| IDC571                                 | Candida albicans | Gut-derived commensal strain                     | UC      | This study         |
| IDC572                                 | Candida albicans | Gut-derived commensal strain                     | UC      | This study         |
| IDC661                                 | Candida albicans | Gut-derived commensal strain                     | UC      | This study         |
| IDC662                                 | Candida albicans | Gut-derived commensal strain                     | UC      | This study         |
| IDC711                                 | Candida albicans | Gut-derived commensal strain                     | UC      | This study         |
| IDC712                                 | Candida albicans | Gut-derived commensal strain                     | UC      | This study         |
| IDB032                                 | Candida albicans | Gut-derived commensal strain                     | Non-IBD | This study         |
| IDB671                                 | Candida albicans | Gut-derived commensal strain                     | Non-IBD | This study         |
| IDB891                                 | Candida albicans | Gut-derived commensal strain                     | Non-IBD | This study         |
| IDC361                                 | Candida albicans | Gut-derived commensal strain                     | Non-IBD | This study         |
| IDC561                                 | Candida albicans | Gut-derived commensal strain                     | Non-IBD | This study         |
| IDC562                                 | Candida albicans | Gut-derived commensal strain                     | Non-IBD | This study         |
| IDC563                                 | Candida albicans | Gut-derived commensal strain                     | Non-IBD | This study         |
| IDD311                                 | Candida albicans | Gut-derived commensal strain                     | Non-IBD | This study         |
| IDD312                                 | Candida albicans | Gut-derived commensal strain                     | Non-IBD | This study         |
| IDD581                                 | Candida albicans | Gut-derived commensal strain                     | Non-IBD | This study         |
| IDD582                                 | Candida albicans | Gut-derived commensal strain                     | Non-IBD | This study         |
| IDD761                                 | Candida albicans | Gut-derived commensal strain                     | Non-IBD | This study         |
| IDB311 ( <i>ece1</i> $\Delta/\Delta$ ) | Candida albicans | Modified from IDB311 strain                      | N/A     | This study         |

|                                        |                     |                              |         |            |
|----------------------------------------|---------------------|------------------------------|---------|------------|
| IDC561 ( <i>ece1</i> $\Delta/\Delta$ ) | Candida albicans    | Modified from IDC561 strain  | N/A     | This study |
| IDB101 ( <i>ece1</i> $\Delta/\Delta$ ) | Candida albicans    | Modified from IDB101strain   | N/A     | This study |
| IDB891 ( <i>ece1</i> $\Delta/\Delta$ ) | Candida albicans    | Modified from IDB891 strain  | N/A     | This study |
| IDB311 ( <i>efg1</i> $\Delta/\Delta$ ) | Candida albicans    | Modified from IDB311 strain  | N/A     | This study |
| IDB101 ( <i>efg1</i> $\Delta/\Delta$ ) | Candida albicans    | Modified from IDB101strain   | N/A     | This study |
| pkID01                                 | Pichia kudriavzevii | Gut-derived commensal strain | Non-IBD | This study |
|                                        |                     |                              |         |            |

**Table 3. Plasmid, primers and repair templates used in this study**

| <b>Plasmids used in this study</b>                  | <b>Description</b>                                                      |
|-----------------------------------------------------|-------------------------------------------------------------------------|
| pV1524                                              | <i>C. albicans</i> CRISPR vector flanked by Neut5+FRT targeting regions |
| pVXL21                                              | pV1524 + sgCaECE1                                                       |
| pVXL22                                              | pV1524 + sgCaEFG1                                                       |
| <b>Oligonucleotide sequences used in this study</b> |                                                                         |
| <b>sgRNA cloning Primers</b>                        |                                                                         |
| CaEfg1gRNA -fwd                                     | atttgTCACAACAGCCACCACTACCg                                              |
| CaEfg1gRNA -rev                                     | aaaacGGTAGTGGTGGCTGTTGTGAc                                              |
| CaEce1gRNA -fwd                                     | atttgAATTTCTGGCAATCTGACGAg                                              |
| CaEce1gRNA -rev                                     | aaaacTCGTCAGATTGCCAGAAATTC                                              |
| <b>Repair Templates for mutagenesis</b>             |                                                                         |
| CaEfg1-delta-fwd                                    | AACGAATTAAGATTTGTTCTATTTGACTACCAAGAATATAACCCATATTATAAATATCAT            |
| CaEfg1-delta-rev                                    | TTTGGAATTTATGGCAGAAAGCAGAAGGTGATGTACACAAATGATATTTATAATATGGGT            |
| CaEce1-delta-fwd                                    | AACAAACAACCTTTCTTTATTTTACTACCAACTATTTTCCATTTCGTTAAAATGCTCAGCA           |
| CaEce1-delta-rev                                    | TGGAATAAAAAGATTAAGCTTGTGGAAAACAAATTTTATCTGCTGAGCATTTTAACGAAT            |
| <b>Colony PCR/Sequencing Primers</b>                |                                                                         |
| Plasmid Sequencing F Primer                         | ggcatagctgaaacttcggccc                                                  |
| CaEce1-PCR-fwd                                      | CAATTCAAAACGAATTGCACC                                                   |
| CaEce1-PCR-rev                                      | ATATCAATACAGCGAGCCAT                                                    |
| CaEfg1-PCR-fwd                                      | AATTCATTACCAGGCGTGTT                                                    |
| CaEfg1-PCR-rev                                      | CGTTCATGTCAATGGATTG                                                     |
| <b>Primers for RT-PCR</b>                           |                                                                         |
| CaEce1-PCR-fwd                                      | cttcaaagactcccacaactcat                                                 |
| CaEce1-PCR-rev                                      | agctttccgaaatattctcaatca                                                |
| CaEfg1-PCR-fwd                                      | CATTGATCCGATTTTACAACG                                                   |
| CaEfg1-PCR-rev                                      | CCTACAACAGATATCAGTATCC                                                  |
| CaActin-PCR-fwd                                     | TCAGACCAGCTGATTTAGGTTTG                                                 |
| CaActin-PCR-rev                                     | GTGAACAATGGATGGACCAG                                                    |

**Table 4 Summary of whole genomes of *C. albicans* strains used in the study**

| <b>C. albicans Strain</b> | <b>Site</b>      | <b>Location</b> | <b>SNP.cluster</b> | <b>SRA.run.number</b> | <b>Source</b>       |
|---------------------------|------------------|-----------------|--------------------|-----------------------|---------------------|
| IDA651                    | colon of UC      | United States   | 2                  | PRJNA702809           | This study          |
| IDA652                    | colon of UC      | United States   | 2                  | PRJNA702809           | This study          |
| IDA653                    | colon of UC      | United States   | 2                  | PRJNA702809           | This study          |
| IDA921                    | colon of UC      | United States   | 2                  | PRJNA702809           | This study          |
| IDA922                    | colon of UC      | United States   | 2                  | PRJNA702809           | This study          |
| IDA923                    | colon of UC      | United States   | 2                  | PRJNA702809           | This study          |
| IDB311                    | colon of UC      | United States   | NC                 | PRJNA702809           | This study          |
| IDB312                    | colon of UC      | United States   | NC                 | PRJNA702809           | This study          |
| IDB313                    | colon of UC      | United States   | NC                 | PRJNA702809           | This study          |
| IDB831                    | colon of UC      | United States   | NC                 | PRJNA702809           | This study          |
| IDB832                    | colon of UC      | United States   | NC                 | PRJNA702809           | This study          |
| IDB833                    | colon of UC      | United States   | NC                 | PRJNA702809           | This study          |
| IDB032                    | colon of Non-IBD | United States   | 1                  | PRJNA702809           | This study          |
| IDB071                    | colon of UC      | United States   | 1                  | PRJNA702809           | This study          |
| IDB072                    | colon of UC      | United States   | 1                  | PRJNA702809           | This study          |
| IDB073                    | colon of UC      | United States   | 1                  | PRJNA702809           | This study          |
| IDB101                    | colon of UC      | United States   | 1                  | PRJNA702809           | This study          |
| IDB102                    | colon of UC      | United States   | 1                  | PRJNA702809           | This study          |
| IDB104                    | colon of UC      | United States   | 1                  | PRJNA702809           | This study          |
| IDB671                    | colon of Non-IBD | United States   | C                  | PRJNA702809           | This study          |
| IDB891                    | colon of Non-IBD | United States   | NC                 | PRJNA702809           | This study          |
| IDC361                    | colon of Non-IBD | United States   | 1                  | PRJNA702809           | This study          |
| IDC481                    | colon of UC      | United States   | NC                 | PRJNA702809           | This study          |
| IDC482                    | colon of UC      | United States   | NC                 | PRJNA702809           | This study          |
| IDC483                    | colon of UC      | United States   | NC                 | PRJNA702809           | This study          |
| IDC561                    | colon of Non-IBD | United States   | 1                  | PRJNA702809           | This study          |
| IDC562                    | colon of Non-IBD | United States   | 1                  | PRJNA702809           | This study          |
| IDC563                    | colon of Non-IBD | United States   | 1                  | PRJNA702809           | This study          |
| IDC571                    | colon of UC      | United States   | 1                  | PRJNA702809           | This study          |
| IDC661                    | colon of UC      | United States   | 2                  | PRJNA702809           | This study          |
| IDC711                    | colon of UC      | United States   | 1                  | PRJNA702809           | This study          |
| IDD311                    | colon of Non-IBD | United States   | 1                  | PRJNA702809           | This study          |
| IDD581                    | colon of Non-IBD | United States   | 1                  | PRJNA702809           | This study          |
| IDD582                    | colon of Non-IBD | United States   | 1                  | PRJNA702809           | This study          |
| IDD761                    | colon of Non-IBD | United States   | 1                  | PRJNA702809           | This study          |
| CEC3560                   | Superficial      | Niger           | 1                  | SRR6669916            | Ropars et al., 2018 |
| CEC4480                   | Food spoilage    | Unknown         | 1                  | SRR6669934            | Ropars et al., 2018 |
| CEC3623                   | Vagina           | Morocco         | 1                  | SRR6669884            | Ropars et al., 2018 |
| CEC4500                   | Food spoilage    | Unknown         | 1                  | SRR6669888            | Ropars et al., 2018 |
| CEC3544                   | Mouth            | Belgium         | 1                  | SRR6669962            | Ropars et al., 2018 |
| CEC3658                   | Superficial      | France          | 1                  | SRR6669900            | Ropars et al., 2018 |
| CEC4883                   | Vagina           | China           | 1                  | SRR6670022            | Ropars et al., 2018 |
| CEC4484                   | Food spoilage    | Unknown         | 1                  | SRR6669909            | Ropars et al., 2018 |
| CEC4107                   | Superficial      | Senegal         | 1                  | SRR6669933            | Ropars et al., 2018 |
| CEC3621                   | Vagina           | Brazil          | 1                  | SRR6669878            | Ropars et al., 2018 |
| CEC3612                   | Vagina           | Morocco         | 2                  | SRR6669942            | Ropars et al., 2018 |

|         |                 |         |    |            |                     |
|---------|-----------------|---------|----|------------|---------------------|
| CEC3558 | Mouth           | Belgium | 2  | SRR6669992 | Ropars et al., 2018 |
| CEC3669 | Superficial     | France  | 2  | SRR6670019 | Ropars et al., 2018 |
| CEC3531 | Mouth           | France  | 2  | SRR6669849 | Ropars et al., 2018 |
| CEC3615 | Vagina          | Morocco | 2  | SRR6669941 | Ropars et al., 2018 |
| CEC4493 | Food spoilage   | Unknown | 2  | SRR6669906 | Ropars et al., 2018 |
| CEC3614 | Vagina          | Morocco | 2  | SRR6669940 | Ropars et al., 2018 |
| CEC4946 | Vagina          | India   | 2  | SRR6670002 | Ropars et al., 2018 |
| CEC4945 | Vagina          | India   | 2  | SRR6670003 | Ropars et al., 2018 |
| CEC4494 | Food spoilage   | Unknown | 2  | SRR6669905 | Ropars et al., 2018 |
| CEC3626 | Mouth           | Belgium | 3  | SRR6669883 | Ropars et al., 2018 |
| CEC3597 | Blood           | France  | 3  | SRR6669920 | Ropars et al., 2018 |
| CEC3579 | Mouth           | France  | 3  | SRR6669918 | Ropars et al., 2018 |
| CEC3637 | Mouth           | Niger   | 3  | SRR6669875 | Ropars et al., 2018 |
| CEC3681 | Blood           | France  | 3  | SRR6669865 | Ropars et al., 2018 |
| CEC709  | Mouth           | France  | 3  | SRR6669979 | Ropars et al., 2018 |
| CEC3557 | Digestive tract | Belgium | 3  | SRR6669991 | Ropars et al., 2018 |
| CEC3596 | Blood           | France  | 3  | SRR6669917 | Ropars et al., 2018 |
| CEC3638 | Mouth           | Belgium | 3  | SRR6669899 | Ropars et al., 2018 |
| CEC1289 | Blood           | France  | 3  | SRR6670011 | Ropars et al., 2018 |
| CEC3675 | Blood           | France  | 4  | SRR6670014 | Ropars et al., 2018 |
| CEC2022 | Disseminated    | France  | 4  | SRR6669857 | Ropars et al., 2018 |
| CEC3610 | Vagina          | Morocco | 4  | SRR6669936 | Ropars et al., 2018 |
| CEC3540 | Blood           | France  | 4  | SRR6669964 | Ropars et al., 2018 |
| CEC3530 | Mouth           | France  | 4  | SRR6669852 | Ropars et al., 2018 |
| CEC3674 | Urine           | France  | 4  | SRR6670015 | Ropars et al., 2018 |
| CEC1492 | Unknown         | Unknown | 4  | SRR6670007 | Ropars et al., 2018 |
| CEC3535 | Vagina          | Morocco | 4  | SRR6669967 | Ropars et al., 2018 |
| CEC3536 | Vagina          | Morocco | 4  | SRR6669966 | Ropars et al., 2018 |
| CEC3532 | Mouth           | France  | 4  | SRR6669850 | Ropars et al., 2018 |
| CEC3622 | Vagina          | Brazil  | 8  | SRR6669877 | Ropars et al., 2018 |
| CEC3634 | Vagina          | Brazil  | 8  | SRR6669881 | Ropars et al., 2018 |
| CEC2023 | Feces           | Guiana  | 8  | SRR6669858 | Ropars et al., 2018 |
| CEC5026 | Vagina          | UK      | 9  | SRR6669994 | Ropars et al., 2018 |
| CEC2018 | Urine           | France  | 9  | SRR6670004 | Ropars et al., 2018 |
| CEC3533 | Mouth           | France  | 9  | SRR6669969 | Ropars et al., 2018 |
| CEC3668 | Urine           | France  | 9  | SRR6669904 | Ropars et al., 2018 |
| CEC3616 | Vagina          | Morocco | 10 | SRR6669944 | Ropars et al., 2018 |
| CEC3706 | Urine           | France  | 10 | SRR6669959 | Ropars et al., 2018 |
| CEC3711 | Urine           | France  | 10 | SRR6669949 | Ropars et al., 2018 |
| CEC3547 | Mouth           | Belgium | 11 | SRR6669972 | Ropars et al., 2018 |
| CEC3618 | Mouth           | Belgium | 11 | SRR6669880 | Ropars et al., 2018 |
| CEC3601 | Mouth           | Belgium | 11 | SRR6669922 | Ropars et al., 2018 |
| CEC4525 | Mouth           | France  | 11 | SRR6669889 | Ropars et al., 2018 |
| CEC4492 | Food spoilage   | France  | 11 | SRR6669911 | Ropars et al., 2018 |
| CEC4495 | Food spoilage   | France  | 11 | SRR6669891 | Ropars et al., 2018 |
| CEC3494 | Feces           | Belgium | 11 | SRR6669854 | Ropars et al., 2018 |
| CEC3561 | Feces           | Belgium | 11 | SRR6669915 | Ropars et al., 2018 |
| CEC1426 | Urine           | France  | 11 | SRR6670009 | Ropars et al., 2018 |

|         |                |             |    |            |                     |
|---------|----------------|-------------|----|------------|---------------------|
| CEC3704 | Urine          | France      | 11 | SRR6669862 | Ropars et al., 2018 |
| CEC3537 | Vagina         | Morocco     | 12 | SRR6669965 | Ropars et al., 2018 |
| CEC2019 | Mouth          | Niger       | 12 | SRR6670005 | Ropars et al., 2018 |
| CEC3680 | Blood          | France      | 12 | SRR6669983 | Ropars et al., 2018 |
| CEC3685 | Blood          | France      | 12 | SRR6669864 | Ropars et al., 2018 |
| CEC3686 | Blood          | France      | 12 | SRR6669861 | Ropars et al., 2018 |
| CEC716  | Mouth          | France      | 12 | SRR6669982 | Ropars et al., 2018 |
| CEC4878 | Vagina         | China       | 13 | SRR6669860 | Ropars et al., 2018 |
| CEC4882 | Vagina         | China       | 13 | SRR6670025 | Ropars et al., 2018 |
| CEC4103 | Vagina         | Senegal     | 13 | SRR6669961 | Ropars et al., 2018 |
| CEC4857 | Vagina         | Angola      | 13 | SRR6669868 | Ropars et al., 2018 |
| CEC4889 | Vagina         | China       | 13 | SRR6670027 | Ropars et al., 2018 |
| CEC5025 | Vagina         | UK          | 13 | SRR6669995 | Ropars et al., 2018 |
| CEC5023 | Vagina         | UK          | 13 | SRR6669997 | Ropars et al., 2018 |
| CEC5030 | Vagina         | UK          | 13 | SRR6669976 | Ropars et al., 2018 |
| CEC4943 | Vagina         | India       | 13 | SRR6670016 | Ropars et al., 2018 |
| CEC4860 | Vagina         | China       | 13 | SRR6669869 | Ropars et al., 2018 |
| CEC3664 | Urine          | France      | 16 | SRR6669898 | Ropars et al., 2018 |
| CEC3550 | Starling feces | France      | 16 | SRR6669985 | Ropars et al., 2018 |
| CEC3600 | Starling feces | France      | 16 | SRR6669919 | Ropars et al., 2018 |
| CEC2876 | Blood          | South Korea | 18 | SRR6669853 | Ropars et al., 2018 |
| CEC2872 | Blood          | South Korea | 18 | SRR6669856 | Ropars et al., 2018 |
| CEC3786 | Blood          | South Korea | 18 | SRR6669957 | Ropars et al., 2018 |
| CEC2871 | Blood          | South Korea | 18 | SRR6669855 | Ropars et al., 2018 |
| CEC3548 | GI tract       | Belgium     | A  | SRR6669971 | Ropars et al., 2018 |
| CEC4038 | Wound          | UK          | A  | SRR6669954 | Ropars et al., 2018 |
| CEC3715 | Urine          | France      | A  | SRR6669955 | Ropars et al., 2018 |
| CEC4254 | Blood          | France      | B  | SRR6669931 | Ropars et al., 2018 |
| CEC3708 | Urine          | France      | B  | SRR6669946 | Ropars et al., 2018 |
| CEC3661 | Urine          | France      | C  | SRR6669895 | Ropars et al., 2018 |
| CEC4039 | Sputum         | UK          | C  | SRR6669953 | Ropars et al., 2018 |
| CEC4498 | Food spoilage  | France      | D  | SRR6669894 | Ropars et al., 2018 |
| CEC3707 | Urine          | France      | D  | SRR6669925 | Ropars et al., 2018 |
| CEC4486 | Food spoilage  | France      | E  | SRR6669907 | Ropars et al., 2018 |
| CEC3712 | Urine          | France      | E  | SRR6669956 | Ropars et al., 2018 |
